# Supplementary material
Source: PubMed Central journal article supplement (PMC9044962)
Supplement: jvi.00249-22-s0001.pdf [file jvi.00249-22-s0001.pdf]

**Table S1. Binding of SARS-CoV-2 RBD to human ACE2 by surface plasmon resonance.**

| ACE2-Fc (a dimer) was coated to protein A chips in a fixed direction (virus-binding surface was fully exposed); RBD-His flowed through                                      | $k_{on}$<br>( $M^{-1}s^{-1}$ ) | $k_{off}$<br>( $s^{-1}$ ) | $K_d$<br>(M)          | $K_a$<br>( $M^{-1}$ ) |
|-----------------------------------------------------------------------------------------------------------------------------------------------------------------------------|--------------------------------|---------------------------|-----------------------|-----------------------|
| Prototypic RBD-His                                                                                                                                                          | $5.96 \times 10^5$             | $1.33 \times 10^{-2}$     | $2.23 \times 10^{-8}$ | $4.48 \times 10^7$    |
|                                                                                                                                                                             | $5.00 \times 10^5$             | $1.27 \times 10^{-2}$     | $2.54 \times 10^{-8}$ | $3.94 \times 10^7$    |
|                                                                                                                                                                             | $1.08 \times 10^6$             | $2.07 \times 10^{-2}$     | $1.93 \times 10^{-8}$ | $5.18 \times 10^7$    |
| S477N (prototypic RBD-His)                                                                                                                                                  | $6.55 \times 10^5$             | $2.74 \times 10^{-3}$     | $4.19 \times 10^{-9}$ | $2.39 \times 10^8$    |
|                                                                                                                                                                             | $2.20 \times 10^6$             | $1.00 \times 10^{-2}$     | $4.55 \times 10^{-9}$ | $2.20 \times 10^8$    |
|                                                                                                                                                                             | $2.48 \times 10^6$             | $1.10 \times 10^{-2}$     | $4.43 \times 10^{-9}$ | $2.26 \times 10^8$    |
| T478K (prototypic RBD-His)                                                                                                                                                  | $9.39 \times 10^5$             | $1.25 \times 10^{-2}$     | $1.34 \times 10^{-8}$ | $7.46 \times 10^7$    |
|                                                                                                                                                                             | $1.88 \times 10^6$             | $3.08 \times 10^{-2}$     | $1.64 \times 10^{-8}$ | $6.10 \times 10^7$    |
|                                                                                                                                                                             | $1.91 \times 10^5$             | $1.81 \times 10^{-3}$     | $9.49 \times 10^{-9}$ | $1.05 \times 10^8$    |
| E484A (prototypic RBD-His)                                                                                                                                                  | $5.81 \times 10^5$             | $1.06 \times 10^{-2}$     | $1.83 \times 10^{-8}$ | $5.46 \times 10^7$    |
|                                                                                                                                                                             | $1.09 \times 10^6$             | $1.42 \times 10^{-2}$     | $1.31 \times 10^{-8}$ | $7.63 \times 10^7$    |
|                                                                                                                                                                             | $1.50 \times 10^6$             | $2.19 \times 10^{-2}$     | $1.47 \times 10^{-8}$ | $6.80 \times 10^7$    |
| Q493R (prototypic RBD-His)                                                                                                                                                  | $2.50 \times 10^5$             | $1.52 \times 10^{-2}$     | $6.05 \times 10^{-8}$ | $1.65 \times 10^7$    |
|                                                                                                                                                                             | $3.37 \times 10^5$             | $2.31 \times 10^{-2}$     | $6.85 \times 10^{-8}$ | $1.46 \times 10^7$    |
|                                                                                                                                                                             | $8.13 \times 10^5$             | $5.13 \times 10^{-2}$     | $6.32 \times 10^{-8}$ | $1.58 \times 10^7$    |
| G496S (prototypic RBD-His)                                                                                                                                                  | $2.19 \times 10^4$             | $2.38 \times 10^{-3}$     | $1.09 \times 10^{-7}$ | $9.17 \times 10^6$    |
|                                                                                                                                                                             | $2.24 \times 10^4$             | $2.80 \times 10^{-3}$     | $1.25 \times 10^{-7}$ | $8.00 \times 10^6$    |
|                                                                                                                                                                             | $3.74 \times 10^5$             | $4.66 \times 10^{-2}$     | $1.25 \times 10^{-7}$ | $8.00 \times 10^6$    |
| Q498R (prototypic RBD-His)                                                                                                                                                  | $6.83 \times 10^5$             | $1.88 \times 10^{-2}$     | $2.75 \times 10^{-8}$ | $3.64 \times 10^7$    |
|                                                                                                                                                                             | $4.75 \times 10^5$             | $1.57 \times 10^{-2}$     | $3.30 \times 10^{-8}$ | $3.03 \times 10^7$    |
|                                                                                                                                                                             | $1.33 \times 10^6$             | $2.84 \times 10^{-2}$     | $2.14 \times 10^{-8}$ | $4.67 \times 10^7$    |
| N501Y (prototypic RBD-His)                                                                                                                                                  | $4.91 \times 10^5$             | $1.43 \times 10^{-3}$     | $2.91 \times 10^{-9}$ | $3.44 \times 10^8$    |
|                                                                                                                                                                             | $1.70 \times 10^6$             | $2.89 \times 10^{-3}$     | $1.70 \times 10^{-9}$ | $5.88 \times 10^8$    |
|                                                                                                                                                                             | $2.20 \times 10^6$             | $3.35 \times 10^{-3}$     | $1.52 \times 10^{-9}$ | $6.58 \times 10^8$    |
| Y505H (prototypic RBD-His)                                                                                                                                                  | $1.94 \times 10^5$             | $5.75 \times 10^{-2}$     | $2.96 \times 10^{-7}$ | $3.38 \times 10^6$    |
|                                                                                                                                                                             | $1.35 \times 10^4$             | $1.64 \times 10^{-3}$     | $1.22 \times 10^{-7}$ | $8.20 \times 10^6$    |
|                                                                                                                                                                             | $8.19 \times 10^3$             | $1.74 \times 10^{-3}$     | $2.12 \times 10^{-7}$ | $4.72 \times 10^6$    |
| Omicron RBD-His                                                                                                                                                             | $1.04 \times 10^6$             | $5.96 \times 10^{-3}$     | $5.72 \times 10^{-9}$ | $1.75 \times 10^8$    |
|                                                                                                                                                                             | $1.01 \times 10^6$             | $6.35 \times 10^{-3}$     | $6.26 \times 10^{-9}$ | $1.60 \times 10^8$    |
|                                                                                                                                                                             | $4.41 \times 10^6$             | $9.41 \times 10^{-3}$     | $2.14 \times 10^{-9}$ | $4.67 \times 10^8$    |
| Prototypic or omicron RBD-His was coated to CM5 chips in random orientations (or certain unknown preferred orientations) by chemical cross-linking; ACE2-His flowed through | $k_{on}$<br>( $M^{-1}s^{-1}$ ) | $k_{off}$<br>( $s^{-1}$ ) | $K_d$<br>(M)          | $K_a$<br>( $M^{-1}$ ) |
| Prototypic RBD-His                                                                                                                                                          | $2.84 \times 10^4$             | $6.90 \times 10^{-3}$     | $2.39 \times 10^{-7}$ | $4.18 \times 10^6$    |
|                                                                                                                                                                             | $2.83 \times 10^4$             | $7.04 \times 10^{-3}$     | $2.49 \times 10^{-7}$ | $4.02 \times 10^6$    |
|                                                                                                                                                                             | $4.84 \times 10^4$             | $1.23 \times 10^{-2}$     | $2.55 \times 10^{-7}$ | $3.92 \times 10^6$    |
| Omicron RBD-His                                                                                                                                                             | $1.60 \times 10^4$             | $2.23 \times 10^{-3}$     | $1.40 \times 10^{-7}$ | $7.14 \times 10^6$    |
|                                                                                                                                                                             | $1.54 \times 10^4$             | $2.25 \times 10^{-3}$     | $1.47 \times 10^{-7}$ | $6.80 \times 10^6$    |
|                                                                                                                                                                             | $2.55 \times 10^4$             | $4.71 \times 10^{-3}$     | $1.84 \times 10^{-7}$ | $5.43 \times 10^6$    |
